# Supplementary material
Source: PubMed Central journal article supplement (PMC4585327)
Supplement: i2164-2591-4-5-6-s01.pdf [file i2164-2591-4-5-6-s01.pdf]

**Supplemental Figure 1.** The viability of pRPC in HBSS-NAC ( $M \pm SEM$ ). Temperature variation or addition of N-acetyl-L-cysteine had a minimal effect on pRPC survival in suspension in vitro, and the pRPC formulation maintained > 80% viability at 9 hours and >65% viability at 48 hours post formulation.

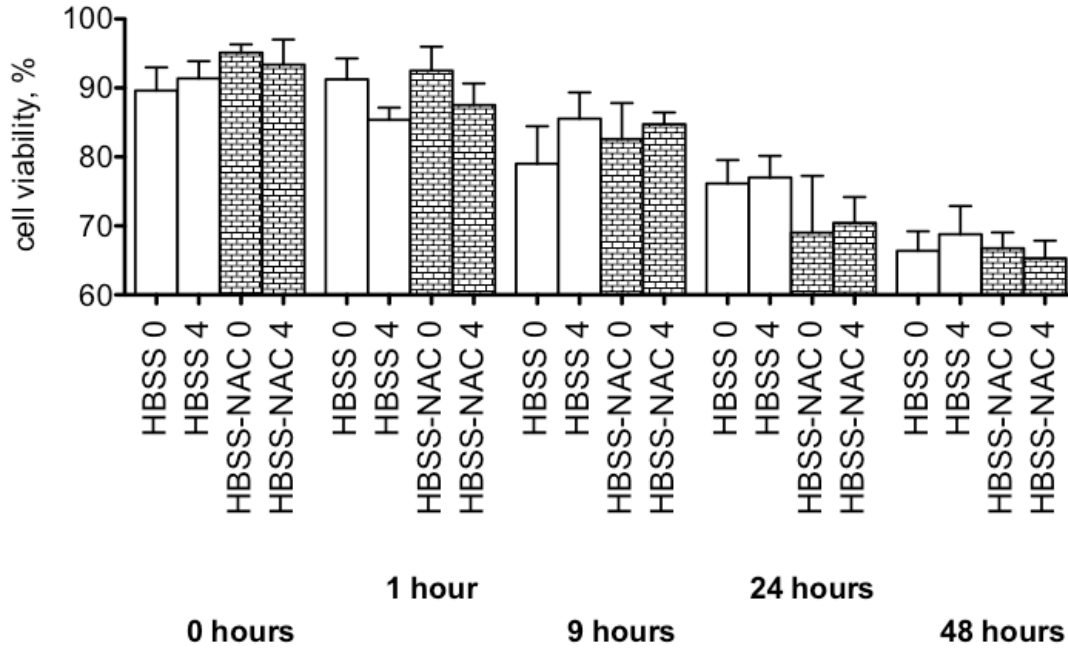

**Supplemental Figure 2.** Antibodies used for immunocytochemistry

| Antigen          | Manufacturer      | Catalog number | Dilution |
|------------------|-------------------|----------------|----------|
| <b>Crx</b>       | Bioss             | Bs-3798R       | 1:100    |
| <b>Nrl</b>       | Santa Cruz        | Sc166087       | 1:50     |
| <b>Lhx2</b>      | Chemicon          | AB10557        | 1:200    |
| <b>Pax6</b>      | Hybridoma Markers |                | 1:50     |
| <b>Sox2</b>      | Chemicon          | AB5603         | 1:200    |
| <b>Klf4</b>      | Chemicon          | 09-821         | 1:200    |
| <b>Vimentin</b>  | Chemicon          | MAB3400        | 1:500    |
| <b>Ki67</b>      | Vector            | VP-K452        | 1:100    |
| <b>Rhodopsin</b> | Chemicon          | MABN15         | 1:500    |
| <b>Recoverin</b> | Chemicon          | AB5585         | 1:500    |
| <b>GFP</b>       | Abcam             | ab13970        | 1:500    |

**Supplemental Figure 3.** Primers used for RT-PCR.

| Target              | Forward                | Reverse                 | Amplicon size, bp |
|---------------------|------------------------|-------------------------|-------------------|
| <b>Klf4</b>         | GCACTGCTCCCGTCCTTCT    | TGCTGGACGCAGTGTCTTCTC   | 69                |
| <b>bActin</b>       | CATGTACGTGGCCATCCAGGC  | CTCCTTGATGTCCCGCACGAT   | 250               |
| <b>Recoverin</b>    | TTCAAGGAGTACGTCATCGCC  | GATGGTCCCGTTGCCGTCC     | 105               |
| <b>MAP2</b>         | CTGCCTTACAGGGTAGCACAA  | CTGAGTAGGGCAAACGGCCTG   | 135               |
| <b>GS</b>           | GGTGAGAAAGTCCAAGCCATGT | TTAGTTTCTCGATGGCCTCCTC  | 766               |
| <b>Vimentin</b>     | TCAACACCGAGTTCAAGAACAC | GTTCTTGGCAGCCACACTTTCA  | 575               |
| <b>M-Opsin</b>      | CAGCCGCAGGCCAGCTTTGAG  | GGAGCGATGTGGTAGTTGGGG   | 107               |
| <b>ROM1</b>         | TCCCTCCTGCCATTCACTG    | CTGAGCTGCATCCAGACTGGC   | 115               |
| <b>Nrl</b>          | GGCTCCACACCCTACAGCTC   | GGCCCCTCAACAGGAACTG     | 212               |
| <b>CRX</b>          | CCCCACTACTCCGTCAATGCC  | ATCCGGGTACTGGGTCTTGG    | 171/1323          |
| <b>OTX2</b>         | CAACCGCCTTACGCAGTCAA   | GGGGTGCAGCAAGTCCATGC    | 63                |
| <b>GAPDH</b>        | GGAGCGAGATCCCGCCAACAT  | GGGAGTTGTCATACTTCTCATGG | 197               |
| <b>S-Opsin</b>      | GAGTATTTGCCTGGTTCCTT   | CCTTCTGGGTTGTAGCTGATT   | 137               |
| <b>mGluR8</b>       | CTCCTTCCGACGGATCTTCCTG | CAGGAGCTGGACGGATATGA    | 181               |
| <b>Rhodopsin</b>    | CTTCCCCATCAACTTCCTCA   | ACCACCACGTACCGTTCAAT    | 264               |
| <b>ConeArrestin</b> | CAAGCTCTCCATCTA        | CAGATCTTTGCGGAATGTCA    | 190               |
| <b>Sox2</b>         | GCCCTGCAGTACAACCTCCA   | GCTGATCATGTCCCGTAGG     | 216               |
| <b>Pax6</b>         | TCCGAGGGGGTCTGTACCAA   | TGGGCCTCATCTGAGTCTTC    | 281               |
